# Supplementary material for: Sediment Quality of the SW Coastal Laizhou Bay, Bohai Sea, China: A Comprehensive Assessment Based on the Analysis of Heavy Metals
Source: PubMed Central journal article supplement (PMC4376849; doi:10.1371/journal.pone.0122190), 2015-03-27
Supplement: pone.0122190.s003.pdf [file pone.0122190.s003.pdf]

**S3 Table.** Mean PEL quotient data.

| Site    | Mean PEL quotient |            | Site | Mean PEL quotient |            | Site | Mean PEL quotient |            |
|---------|-------------------|------------|------|-------------------|------------|------|-------------------|------------|
|         | May-Jun.          | Sept.-Oct. |      | May-Jun.          | Sept.-Oct. |      | May-Jun.          | Sept.-Oct. |
| YHH3    | 0.39              | 0.32       | XQH2 | 0.38              | 0.39       | I3   | 0.21              | 0.21       |
| YHH2    | 0.55              |            | XQH1 | 0.34              | 0.33       |      |                   |            |
| YHH1    | 0.56              | 0.22       | K1   | 0.26              | 0.28       | DH2  | 0.38              | 8.46       |
| GLH3    | 0.28              | 0.57       | K2   | 0.21              | 0.25       | DH1  | 0.36              | 1.14       |
| GLH2    | 0.32              | 0.28       | K3   | 0.27              | 0.21       | YH5  | 0.22              | 0.24       |
| GLH1    | 0.36              | 0.32       |      |                   |            | YH4  | 0.33              | 0.45       |
| YHH-GLH | 0.35              | 0.32       | MH4  | 0.39              | 0.42       | YH3  | 0.24              | 0.23       |
| ZMH2    | 0.24              | 0.31       | MH3  | 0.45              |            | YH2  | 0.23              | 0.24       |
| ZMH1    | 0.30              | 0.47       | MH2  | 0.20              | 0.18       | YH1  | 0.19              | 0.19       |
| ZM-YHH  | 0.28              | 0.28       | MH1  | 0.55              | 0.31       | H1   | 0.24              | 0.26       |
| L1      | 0.20              | 0.23       | J1   | 0.16              | 0.20       | H2   | 0.21              | 0.23       |
| L2      | 0.15              | 0.18       | J2   | 0.19              | 0.23       | H3   | 0.22              | 0.26       |
| L3      | 0.20              | 0.21       | J3   | 0.22              | 0.25       |      |                   |            |
| L4      | 0.17              | 0.20       | J4   | 0.27              | 0.28       | WH3  | 0.29              | 0.21       |
| L5      | 0.21              | 0.22       |      |                   |            | WH2  | 0.32              | 0.23       |
|         |                   |            | BLH3 | 0.22              | 0.16       | WH1  | 0.24              | 0.23       |
| MH6     | 0.18              | 0.17       | BLH2 | 0.23              | 0.25       |      |                   |            |
| MH5     | 0.39              | 0.33       | BLH1 | 0.17              | 0.27       | JLH2 | 0.33              | 0.28       |
| XQH4    | 0.66              | 0.74       | I1   | 0.21              | 0.23       | JLH1 | 0.14              | 0.15       |
| XQH3    | 0.63              | 0.86       | I2   | 0.17              | 0.22       |      |                   |            |
